# Baptism of fire: Modeling the effects of prescribed fire on tick-borne disease

December 31, 2021

Emily Guo<sup>1</sup> and Folashade B. Agosto<sup>2†</sup>

<sup>1</sup>*Department of Biology, Washington University in St. Louis, St. Louis MO*

<sup>2</sup>*Department of Ecology and Evolutionary Biology, University of Kansas, Lawrence, KS*

## Abstract

Recently, tick-borne illnesses have been trending upward and are an increasing source of risk to people's health in the United States. This is due to range expansion in tick habitats as a result of climate change. Thus, it is imperative to find a practical and cost-efficient way of managing tick populations. Prescribed burns are a common form of land management that can be cost efficient if properly managed and can be applied across large amounts of land. In this study, we present a compartmental model for ticks carrying Lyme disease and uniquely incorporate the effects of prescribed fire using an impulsive system to investigate the effects of prescribed fire intensity (high and low) and the duration between burns. Our study found that fire intensity has a larger impact in reducing tick population than the frequency between burns. Furthermore, burning at high intensity is preferable to burning at low intensity whenever possible, although high intensity burns may be unrealistic due to environmental factors. Annual burns resulted in the most significant reduction of infectious nymphs, which are the primary carriers of Lyme disease.

Key words: Ticks, Lyme disease, prescribed fire, fire intensity, impulse control

## 1 Introduction

Many ticks are disease vectors that significantly impact public health. Reports of overall tick-borne diseases doubled from 2006 to 2018 [3] while the incidence of Lyme disease in the United States has been steadily increasing, from a little less than four cases per 100,000 people in the 1990s to close to 10 cases per 100,000 people in the early 2000s [21]. New pathogens continue to emerge, including heartland virus, *Bourbon virus*, *Borrelia miyamotoi*, *Borrelia mayonii*, and *Ehrlichia muris eauclairensis* [10]. Climate change has expanded the northern borders of tick habitats and increased winter tick activity, contributing to the prevalence of tick-borne diseases [11]. Therefore, finding a practical and cost-efficient way to manage tick populations has become extremely important. The majority of ticks that carry Lyme disease are infected through mice or other small rodents [2], so most methods that have looked at tick reduction are focused on either host reduction or tick elimination [20]. Ticks can have research that has not been certified by peer review and should not be used to guide clinical practice. NOTE: This preprint reports new research that has not been certified by peer review and should not be used to guide clinical practice. require one blood meal after the eggs hatch: egg, larvae, nymph, and adult [20]. The majority of human infections come from tick nymphs, which are much smaller than adult

31 ticks (less than 2mm long or about the size of a poppyseed), making them more difficult  
32 to spot on the human body and therefore more likely to remain undetected [20]. Nymphs  
33 are also more numerous than adult ticks and are most active during the spring and summer  
34 months, when the number of people who spend time outside is substantially larger than  
35 those during other months. The blacklegged tick, also known as *Ixodes scapularis*, has a  
36 life-cycle that generally lasts two years, while the life-cycle of the lone star tick (*Amblyomma*  
37 *americanum*) is around three years long. Most ticks hatch from their eggs in the spring and  
38 have the ability to live for three to five months between each blood meal [9].

39 Prescribed fires, or controlled burns, are a common and necessary form of land management  
40 in many different environments that are also effective in controlling tick populations. This is  
41 through both directly killing ticks along with destroying their leaf-litter habitat [9]. Larvae,  
42 nymphs, and adults spend the vast majority of their time in leaf litter other than the few  
43 days that they are feeding on their hosts. Controlled burns are appealing due to their time  
44 and cost efficiency along with their ability to be applied across a large amount of land. They  
45 are generally most effective in the late spring and early summer, as that time coincides with  
46 when nymph ticks are questing for hosts (although this is heavily dependent on the type of  
47 land that is being burned) [5]. Primary concerns around prescribed fire include air quality  
48 (due to smoke) and the potential for the fire to burn out of control; however, these can be  
49 prevented when proper precautions are taken.

50 Many studies have looked at the impact of prescribed fires on tick populations, with conflict-  
51 ing results. The majority of these studies agree that tick populations decrease immediately  
52 after a burn but recover to pre-burn abundance after around one year [20]. Other stud-  
53 ies have found that although the nymph population decreased, the risk of encountering  
54 infectious nymphs remained the same [16] or that the tick population even increased [19].  
55 However, these studies often fail to account for the logistics of true prescribed burning (long  
56 term and over lots of land on a regular basis) or other predictors of tick abundance such  
57 as host abundance, climate, or vegetation structure [20]. There is also the possibility that  
58 post-burn recolonization rates vary based on tick species, habitat type, climate, and burn  
59 intensity [1, 6].

60 A study done by Allan [1] in the oak-hickory ecosystems of the Missouri Ozarks looked at the  
61 relationship between lone star tick larvae populations and deer abundance under long-term  
62 burn management. The sites were burned in the spring at low intensity every 3-5 years.  
63 The ticks were depleted but then rapidly grew starting two years post-burn, coming back  
64 down to pre-burn abundance around five years post-burn [1]. The researchers attributed this  
65 increase to the high host populations post-burn, as freshly burnt areas are better for deer to  
66 forage in. These issues could be countered by more frequent, longer, and larger scale burns,  
67 which correlates with other studies that also believe that burns at higher intensity are most  
68 effective in countering ticks than those at low intensity [8]. Gleim *et al* [10] found that long  
69 term prescribed fire (regular burning for 10+ years) significantly reduced tick abundance,  
70 regardless of burn interval, host abundance, or vegetation structure. This is primarily due  
71 to the change in vegetation structure, creating a hotter and drier environment that is less  
72 appealing for ticks [20]. These burnings decreased the encounter rate with infectious ticks  
73 by 98% in plots in southwestern Georgia and northwestern Florida. However, more research  
74 in a variety of environments needs to be done regarding realistic prescribed burning as a  
75 tick management technique.

76 The goal of this study is to develop a compartmental model for ticks carrying Lyme disease

77 to see how they are affected by prescribed burns. We look at both fire intensities (high  
78 and low) and the duration between fires in order to understand how this common land  
79 practice affects tick populations and the prevalence of Lyme disease among them. We also  
80 investigate whether intensity or duration plays a more significant role in tick population  
81 reduction overall. To the best of our knowledge, this is the first study to use a mathematical  
82 model for Lyme disease to examine the effects of prescribed fire.

83 The remainder of the work in this paper is organized as follows. In Section 2, we formulate  
84 our baseline tick/Lyme disease model, compute the model basic reproduction number, and  
85 carry out basic stability analysis including sensitivity analysis to determine the parameter  
86 with the most impact on the basic reproduction number. In Section 2.3, we describe the tick  
87 model with the effect of prescribed fire using an impulsive system of ordinary differential  
88 equations and present some stability analysis results of the impulsive system. In Section  
89 2.3.1, we discuss the estimation of parameters related prescribed fire from literature. In  
90 Section 3, we present some simulation results, and in Section 4 we discuss our findings and  
91 close with conclusions.

## 92 2 Materials and Methods

93 This model was created by incorporating two subgroups: mice and ticks. The mice pop-  
94 ulation is divided into susceptible ( $S_M(t)$ ) and infected mice  $I_M(t)$ ). The tick population  
95 is divided by life stage (eggs, larvae, nymph, and adult) and further divided into suscepti-  
96 ble and infected groups for larvae ( $S_L(t)$  and  $I_L(t)$ ), nymphs ( $S_N(t)$  and  $I_N(t)$ ), and adults  
97 ( $S_A(t)$  and  $I_A(t)$ ). Since ticks must take a blood meal before they become infected and there  
98 is no vertical transmission for the disease, all eggs remain susceptible ( $S_E(t)$ ). Individuals  
99 move between compartments according to their life stage and disease status. We assume  
100 that all transition rates are of the current population and remain steady, with no migration  
101 into or out of the overall population.

The force of infection in the mice (or the rate that susceptible mice become infected) is given  
as

$$\lambda_M = \frac{\beta_M(I_L + I_N + I_A)}{N_M}$$

102 where the parameter  $\beta_M$  is the probability that infection will occur if a mouse is bitten  
103 by an infectious tick, multiplied by the number of all infectious ticks – the sum of the  
104 larvae, nymphs, and adults – and then divided by the total number of mice where  $N_M =$   
105  $S_M + I_M$ . For simplicity, we assume that there is a homogenous mixing of both mice and  
106 tick populations. New mice are born at a rate of  $\pi_M$ , and the susceptible mice move into  
107 the infected compartment at a rate of  $\lambda_M$ . Since the disease does not affect the mice, they  
108 remain in the infected compartment for the rest of their lives and death related to the disease  
109 is not incorporated into the model. Therefore, natural death, given as the rate  $\mu_M$ , is the  
110 only factor decreasing the population of both susceptible and infected mice. The equations  
111 for the susceptible mouse population and infected mouse population are shown below:

$$\begin{aligned} \frac{dS_M}{dt} &= \pi_M - \lambda_M S_M - \mu_M S_M \\ \frac{dI_M}{dt} &= \lambda_M S_M - \mu_M I_M \end{aligned} \quad (1)$$

112 The force of infection in the ticks (or the rate that ticks become infectious) is given as

$$\lambda_T = \frac{\beta_T I_M}{N_M}$$

113 where the parameter  $\beta_T$  is the probability that infection will occur if a tick bites an infected  
 114 mouse, multiplied by the total number of infected mice and divided by the overall mice pop-  
 115 ulation (both susceptible and infected). Since there is no vertical transmission of the disease  
 116 between adult ticks and their eggs, we assume that there is no infected egg compartment.  
 117 We also assume that all adult ticks are capable of reproduction, regardless of whether they  
 118 are susceptible or infected. The eggs mature into the larvae category at a rate of  $\sigma_T$ , with  
 119 a certain percentage dying naturally at the rate  $\mu_E$ .

$$\frac{dS_E}{dt} = \pi_T S_A + \pi_T I_A - \sigma_T S_E - \mu_E S_E.$$

120 The susceptible larvae then have the possibility of moving into the infected larvae category  
 121 at a rate of  $\lambda_T$  or remaining in the susceptible larvae compartment. Both susceptible and  
 122 infected larvae populations are affected by the natural death rate of  $\mu_L$ . They also both  
 123 move into their respective nymph compartments at a rate of  $\tau_T$ , regardless of whether they  
 124 are susceptible or infected. This leads to the following system of equations for larvae

$$\begin{aligned} \frac{dS_L}{dt} &= \sigma_T S_E - \lambda_T S_L - \tau_T S_N - \mu_L S_L & (2) \\ \frac{dI_L}{dt} &= \lambda_T S_L - \tau_T I_L - \mu_L I_L \end{aligned}$$

125 After taking another blood meal, susceptible nymphs move into the infected nymph com-  
 126 partment at the rate  $\lambda_T$ . Both susceptible and infectious nymph populations are reduced  
 127 by the natural death rate of  $\mu_N$  and continue to mature into adults at the rate of  $\gamma_T$ . The  
 128 equations for the development rate of nymphs are given below

$$\begin{aligned} \frac{dS_N}{dt} &= \tau_T S_L - \lambda_T S_N - \gamma_T S_N - \mu_N S_N & (3) \\ \frac{dI_N}{dt} &= \tau_T I_L + \lambda_T S_N - \gamma_T I_N - \mu_N I_N. \end{aligned}$$

129 Although it is less common than at other life stages, adult ticks are still able to become  
 130 infectious. Susceptible adults move into the infected compartment at the rate  $\lambda_T$ , after they  
 131 take a blood meal at that life stage. Both susceptible and infected adult populations are  
 132 removed by natural death rate of  $\mu_A$ . The equations for both susceptible and infected adult  
 133 ticks are given as

$$\begin{aligned} \frac{dS_A}{dt} &= \gamma_T S_N - \lambda_T S_A - \mu_A S_A & (4) \\ \frac{dI_A}{dt} &= \gamma_T I_N + \lambda_T S_A - \mu_A I_A. \end{aligned}$$

134 Incorporating all the assumptions and equations above, we have the following system of  
 135 differential equations:

$$\begin{aligned}
 \frac{dS_M}{dt} &= \pi_M - \lambda_M S_M - \mu_M S_M \\
 \frac{dI_M}{dt} &= \lambda_M S_M - \mu_M I_M \\
 \frac{dS_E}{dt} &= \pi_T \left(1 - \frac{S_E}{K}\right) (S_A + I_A) - \sigma_T S_E - \mu_E S_E \\
 \frac{dS_L}{dt} &= \sigma_T S_E - \lambda_T S_L - \tau_T S_L - \mu_L S_L \\
 \frac{dI_L}{dt} &= \lambda_T S_L - \tau_T I_L - \mu_L I_L \\
 \frac{dS_N}{dt} &= \tau_T S_L - \lambda_T S_N - \gamma_T S_N - \mu_N S_N \\
 \frac{dI_N}{dt} &= \tau_T I_L + \lambda_T S_N - \gamma_T I_N - \mu_N I_N \\
 \frac{dS_A}{dt} &= \gamma_T S_N - \lambda_T S_A - \mu_A S_A \\
 \frac{dI_A}{dt} &= \gamma_T I_N + \lambda_T S_A - \mu_A I_A
 \end{aligned}
 \tag{5}$$

136  
137

The related model schematic is given in Figure 1 and the description of the model variables and parameters are stated in Table 1.

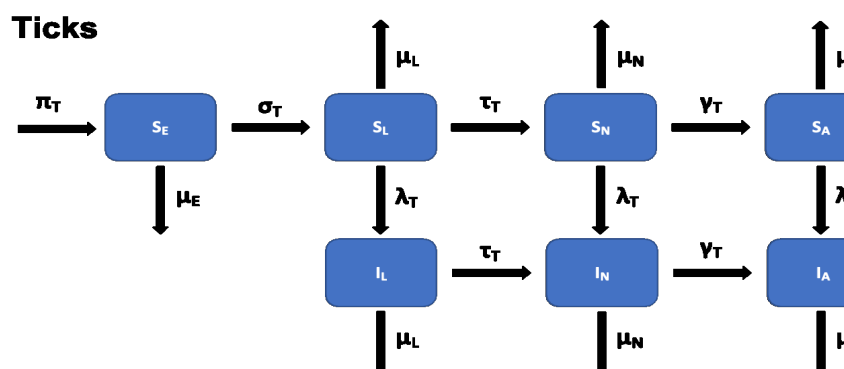

Figure 1: Flow diagram of the Lyme disease model for ticks and mice. The mice population is represented by the red boxes and is divided into susceptible ( $S_M(t)$ ) and infected ( $I_M(t)$ ) compartments. The tick population is represented by the blue boxes and is divided by life stage and infection status. It consists of susceptible eggs ( $S_E(t)$ ), susceptible larvae ( $S_L(t)$ ), infected larvae ( $I_L(t)$ ), susceptible nymphs ( $S_N(t)$ ), infected nymphs ( $I_N(t)$ ), susceptible adults ( $S_A(t)$ ), and infected adults ( $I_A(t)$ ).

| Variable | Description                  |
|----------|------------------------------|
| $S_M(t)$ | Number of susceptible mice   |
| $I_M(t)$ | Number of infected mice      |
| $S_E(t)$ | Number of eggs               |
| $S_L(t)$ | Number of susceptible larvae |
| $I_L(t)$ | Number of infected larvae    |
| $S_N(t)$ | Number of susceptible nymphs |
| $I_N(t)$ | Number of infected nymphs    |
| $S_A(t)$ | Number of susceptible adults |
| $I_A(t)$ | Number of infected adults    |

  

| Parameter                    | Description                                                   |         |      |
|------------------------------|---------------------------------------------------------------|---------|------|
| $\pi_M$                      | Mice birth rate                                               | 0.02    | [15] |
| $\mu_M$                      | Mice mortality rate                                           | 0.01    | [15] |
| $\beta_M$                    | Tick-to-mouse transmission probability                        | 0.9     | [13] |
| $\pi_T$                      | Tick birth rate                                               | 456.36  | [15] |
| $K$                          | Carrying capacity                                             | 5,000   | [14] |
| $\mu_E$                      | Death rate / inviability rate of the egg                      | 0.0025  | [15] |
| $\sigma_T$                   | Eggs to larvae developmental rate                             | 0.00677 | [15] |
| $\mu_E, \mu_L, \mu_N, \mu_A$ | Tick mortality rate at different life-stages                  |         |      |
| $\mu_T$                      | Tick mortality rate                                           | 0.015   | [15] |
| $\beta_T$                    | Mouse-to-tick transmission probability                        | 0.9     | [13] |
| $\tau_T$                     | Larvae to nymphs development rate (or nymph development rate) | 0.00618 | [15] |
| $\gamma_T$                   | Nymphs to adults development rate of (adult development rate) | 0.00491 | [15] |

Table 1: Description of the variables and parameters for the Lyme disease model (5).

138 The basic qualitative properties of the tick model (5), its positivity, and the boundedness of  
139 solutions are given in Appendix A

## 140 2.1 Reproduction number $\mathcal{R}_0$

141 The associated reproduction number using the next generation matrix method[4, 17] for the  
142 Lyme disease model (5), denoted by  $\mathcal{R}_0$ , is given by

$$\mathcal{R}_0 = \sqrt{\frac{\beta_M \beta_T (k_1 k_2 S_A^{**} + (k_2 \mu_A + \tau_T \mu_A + \tau_T \gamma_T) S_L^{**} + (\mu_A + \gamma_T) k_1 S_N^{**})}{k_1 k_2 \mu_A S_M^{**} \mu_M}}. \quad (6)$$

143 However we made a simplifying assumption that  $\mu_L = \mu_N = \mu_A = \mu_T$ . Then, the reproduc-  
144 tion number in (6) becomes

$$\mathcal{R}_0 = \sqrt{\frac{\beta_M \beta_T (S_A^* + S_L^* + S_N^*)}{S_M^* \mu_M \mu_T}}, \quad (7)$$

145 see details in Appendix B.

146 The basic reproduction number,  $\mathcal{R}_0$ , is defined as the expected number of new infections  
147 that result from one infectious individual in a population that is fully susceptible [4, 17].  
148 This value is extremely significant because if the reproduction number is less than unity  
149 ( $\mathcal{R}_0 \leq 1$ ) then the disease cannot invade the population and it will die out in the community.

150 Conversely, if  $\mathcal{R}_0 > 1$  then the disease will continue to persist in the population. This  
 151 determines whether there is a possibility of disease elimination or if the goal should be to  
 152 manage transmission within the community.

## 153 2.2 Sensitivity analysis

Sensitivity analysis was conducted in order to determine the contribution of each of the  
 model parameters on the reproduction number  $\mathcal{R}_0$ . Results of this help identify which  
 parameters are the best to target regarding interventions and future data collection. A  
 normalized forward sensitivity index was used to determine the ratio of the relative change  
 in  $\mathcal{R}_0$  based on a relative change in a parameter. The sensitivity indices of  $\mathcal{R}_0$  is derived as

$$\Upsilon_p^{\mathcal{R}_0} = \frac{\partial \mathcal{R}_0}{\partial p} \times \frac{p}{\mathcal{R}_0},$$

154 where  $\Upsilon_p^{\mathcal{R}_0}$  is the forward sensitivity index of  $\mathcal{R}_0$  with respect to parameter  $p$ . Parameter  $p$   
 155 is a parameter within  $\mathcal{R}_0$ . The results of this sensitivity analysis are shown below in Figure  
 156 2:

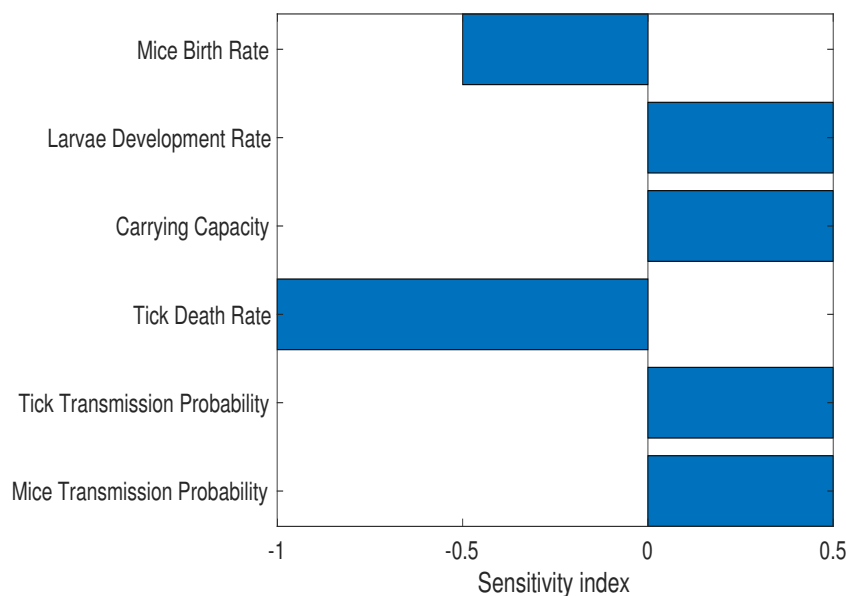

Figure 2: Sensitivity analysis results for the Lyme disease model. The larvae development rate, the carrying capacity, and the disease transmission probability for both mice and ticks are all positive influences on  $\mathcal{R}_0$ . The mice birth rate and tick death rate are negative influences on  $\mathcal{R}_0$ . Prescribed fire directly increases the tick death rate, making it an effective control strategy.

157 The larvae development rate, the carrying capacity of the environment, and the disease  
 158 transmission probability for both mice and ticks all positively affect  $\mathcal{R}_0$ . As these values  
 159 increase,  $\mathcal{R}_0$  will also increase. We are more interested in the mice birth rate and the tick  
 160 death rate, which negatively affect  $\mathcal{R}_0$ . As these parameters decrease,  $\mathcal{R}_0$  will also decrease.  
 161 The most influential parameter on  $\mathcal{R}_0$  is the tick death rate. This suggests that control  
 162 strategies that effectively target the spread of Lyme disease will focus on increasing the  
 163 tick death rate, and to a lesser extent, also decreasing the mice birth rate. The sensitivity  
 164 analysis aligns with our results from the model, as prescribed fire is a mechanism that most  
 165 significantly affects the tick death rate.

## 2.3 Tick model with prescribed fire

In this section we consider the effect of fire on ticks and the small mammal population. We do not explicitly incorporate fire into the model (5); rather, we consider the effect of fire on population size after the burns. To introduce the effect of prescribed fire into the Lyme disease model (5), we have the following system of non-autonomous impulsive differential equations.

$$\left. \begin{aligned} \frac{dS_M}{dt} &= \pi_M - \lambda_M S_M - \mu_M S_M \\ \frac{dI_M}{dt} &= \lambda_M S_M - \mu_M I_M \\ \frac{dS_E}{dt} &= \pi_T \left(1 - \frac{S_E}{K}\right) (S_A + I_A) - (\sigma_T + \mu_E) S_E \\ \frac{dS_L}{dt} &= \sigma_T S_E - \lambda_T S_L - (\tau_T + \mu_L) S_L \\ \frac{dI_L}{dt} &= \lambda_T S_L - (\tau_T + \mu_L) I_L \\ \frac{dS_N}{dt} &= \tau_T S_L - \lambda_T S_N - (\gamma_T + \mu_N) S_N \\ \frac{dI_N}{dt} &= \tau_T I_L + \lambda_T S_N - (\gamma_T + \mu_N) I_N \\ \frac{dS_A}{dt} &= \gamma_T S_N - \lambda_T S_A - \mu_A S_A \\ \frac{dI_A}{dt} &= \gamma_T I_N + \lambda_T S_A - \mu_A I_A \end{aligned} \right\} t \neq nT, n \in \mathbb{N} \quad (8)$$

subject to the prescribed fire impulsive condition

$$\left. \begin{aligned} S_M(nT^+) &= (1 - \nu_M) S_M(nT^-), & I_M(nT^+) &= (1 - \nu_M) I_M(nT^-) \\ S_E(nT^+) &= (1 - \nu_E) S_E(nT^-) \\ S_L(nT^+) &= (1 - \nu_L) S_L(nT^-), & I_L(nT^+) &= (1 - \nu_L) I_L(nT^-) \\ S_N(nT^+) &= (1 - \nu_N) S_N(nT^-), & I_N(nT^+) &= (1 - \nu_N) I_N(nT^-) \\ S_A(nT^+) &= (1 - \nu_A) S_A(nT^-), & I_A(nT^+) &= (1 - \nu_A) I_A(nT^-) \end{aligned} \right\} t = nT, n \in \mathbb{N}, \quad (9)$$

where  $t_n$  is the times that prescribed fire is implemented, which may be fixed or non-fixed; in this study we will consider the case with fixed times. The parameters  $\nu_j$ , where  $j = E, L, N, A, M$  are the proportion of the tick and mice population that is reduced by the fire. In Section 2.3.1 below, we discuss how these parameters are estimated using data from low and high intensity fires. The existence, and stability of the impulsive model (8) are given in Appendix C.



### 2.3.1 Prescribed fire parameter estimation

To estimate the parameters ( $\nu_L$ ,  $\nu_N$ ,  $\nu_A$ ,  $\nu_M$ ) which quantify the reduction in each tick life-stage and mice population after the different burn intensities (low and high burns) we use data from [8, 18]. The parameters for each life stage relating to the low intensity burn were estimated using data from [8], while the parameters relating to the high intensity burn were estimated using data from [18]. Each group of parameters was separated into the larvae, nymph, and adult life stages, but only data in [18] provided data to estimate the parameter for mice population. Below we give a summary description of the study sites in each study, the amount of ticks and mice collected and how these parameters are estimated from the data collected.

**High intensity fire:** The study in [18] was conducted in chaparral habitat at the University of California, Hopland Research and Extension Center, in Mendocino County, CA. The study took advantage of two prescribed fires ignited on 1 June 1995 that were intended to reduce fire load in two chaparral plots, Maude’s Glade (MG) and Don’s Brush Plot (DBP). The fires were ignited by hand crews using drip torches in a strip headfire configuration to produce relatively uniform fire behavior that left no live branches in the shrub-line, which we assume as high intensity fire. For a period of 13 months beginning a month before the burn, control and treatment areas were monitored for the presence of ticks by flagging the vegetation or ground between 0800 and 1000 hours, along with CO<sub>2</sub>-baited pitfall traps. In order to assess the abundance of rodents and the associated ticks on them, live traps were set to catch the rodents.

At the two study sites (MG and DBP), six tick species (namely, *Ixodes pacificus*, *Ixodes jellisoni*, *Ixodes spinipalpis*, *Ixodes woodi*, *Dermacentor occidentalis* and *Dermacentor parumapertus*) were removed from the six different rodents species caught; these include California kangaroo rat (*Dipodomys californicus californicus*), brush mouse (*Peromyscus boylii*), pinõn mouse (*P. truei sequoiensis*), deer mouse (*P. maniculatus gambelii*), dusky-footed woodrat (*Neotoma fuscipes*), and western harvest mouse (*Reithrodontomys megalotis longicaudus*). After the fire treatment, about half as many rodents were trapped at the treated sites compared with control sites.

All the ixodid tick species (*Ixodes pacificus*, *Ixodes jellisoni*, *Ixodes spinipalpis*, *Ixodes woodi*) are competent hosts that are able to transmit Lyme disease, but we use only the data of *Ixodes pacificus* to estimate the parameter used to quantify the reduction in the tick population as a result of fire. Table 2 gives a break down of *Ixodes pacificus* collected on the rodents in the control and treated areas at both MG and DBP sites, as well as the number rodents collected at these sites pre-and post-burn.

|       | Larvae C | Larvae B | Nymph C | Nymph B | Adult C | Adult B | Rodent C | Rodent B |
|-------|----------|----------|---------|---------|---------|---------|----------|----------|
| DBP   | 79       | 101      | 3       | 1       | 14      | 5       | 56       | 27       |
| MG    | 80       | 17       | 0       | 2       | 8       | 7       | 54       | 25       |
| Total | 159      | 118      | 3       | 3       | 22      | 12      | 110      | 52       |

Table 2: Data taken from [18] under assumed high intensity fire. C = control, B = burn.

**Computing parameters  $\nu_L$ ,  $\nu_N$ ,  $\nu_A$ ,  $\nu_M$  for high intensity fire:** To compute these parameters we assume that equal numbers of ticks and rodents are in the sites

216 (control and treated sites) pre-burn, and the difference in number is due to the burn,  
 217 since we have no way to measure exactly the number of ticks in all the study sites.  
 218 First, we take the difference between the total number of ticks and mice in the control  
 219 and treatment sites and divide it by the total number of ticks and mice in the control  
 220 sites. Then we subtract these proportions from 1 to give the proportions reduced as  
 221 a result of the burn.

$$\begin{aligned}
 \text{adult} : & \quad (22 - 12)/184 = 0.05435, & \implies & \quad \nu_A = 1 - 0.05435 = 0.5454 \\
 \text{nymphs} : & \quad (3 - 3)/3 = 0/184 = 0.0, & \implies & \quad \nu_N = 1 - 0 = 1 \\
 \text{larvae} : & \quad (159 - 118)/184 = 0.2228, & \implies & \quad \nu_L = 1 - 0.2228 = 0.7421 \\
 \text{Mice} : & \quad (110 - 52)/110 = 0.5272 & \implies & \quad \nu_M = 1 - 0.5272 = 0.4728.
 \end{aligned}$$

222 **Low intensity fire:** The study in [8] was conducted in an open oak woodland bar-  
 223 ren complex at Western Illinois University's Alice L. Kibbe Field Station located in  
 224 Warsaw, in Hancock County, IL, USA. These areas are comprised of multiple habitat  
 225 types including oak-hickory woodlands, early successional woodlands, oak barrens,  
 226 floodplain forests, restored tallgrass prairies and hill prairies. The entire study site  
 227 was last burned in 2004 (B04) and two additional burns were carried out in spring of  
 228 2014 (B14) and 2015 (B15). The burns were considered low intensity because most  
 229 flame heights were less than 1 meter and plant mortality was limited to the understory  
 230 vegetative community [23].

231 Ticks were collected through flagging method every two weeks when the vegetation  
 232 was dry between 1200 and 1800 hours, during two consecutive years (9 May 2015  
 233 until 30 October 2015 and 22 April 2016 until 4 November 2016). A total of 2788  
 234 *Amblyomma americanum*, 54 *Ixodes scapularis*, and 23 *Dermacentor variabilis* ticks  
 235 were collected in 2015 and 2016. *Amblyomma americanum* ticks collected in B04 made  
 236 up 51% of the collection ( $n = 1433$ ), while those collected in B14 made up 37%  
 237 ( $n = 1045$ ) of the collections, and those collected in B15 constituted 11% ( $n = 307$ ) of  
 238 the collection. Of these ticks, 2% ( $n = 67$ ) were adults, 4% ( $n = 107$ ) were nymphs,  
 239 and 93% ( $n = 2614$ ) were larvae. Of the 23 *D. variabilis* collected, 74% ( $n = 17$ )  
 240 were adults, 9% ( $n = 2$ ) were nymphs, and 17% ( $n = 4$ ) were larvae. While 4%  
 241 ( $n = 2$ ) of the 54 *I. scapularis* collected, were adults, 22% ( $n = 12$ ) were nymphs,  
 242 and 74% ( $n = 40$ ) were larvae. Here we use the data collected for *Ixodes scapularis*  
 243 to estimate the parameter quantifying the reduction in the tick population due to fire  
 244 since *I. scapularis* can transmit Lyme disease. The study did not indicate if these  
 245 were data for the pre-burn or post burn number of *I. scapularis* collected, nor did it  
 246 provide data for the number of mice that were caught.

247 **Estimating parameters  $\nu_L$ ,  $\nu_N$ ,  $\nu_A$ ,  $\nu_M$  for low intensity fire:** To estimate these  
 248 parameters, we assume the 54 *I. scapularis* collected are the ticks left after the burn.  
 249 We then divide the numbers collected in each age group by the total number collected  
 250 and subtract the proportion obtained from 1 to obtain the proportion reduced by fire.

$$\begin{aligned}
 \text{adult} : & \quad 2/54 = 0.037, & \implies & \quad \nu_A = 1 - 0.037 = 0.9629 \\
 \text{nymphs} : & \quad 12/54 = 0.222, & \implies & \quad \nu_N = 1 - 0.222 = 0.7778 \\
 \text{larvae} : & \quad 40/54 = 0.741, & \implies & \quad \nu_L = 1 - 0.741 = 0.2593.
 \end{aligned}$$

251 Although, these were the best sources of data we could find (that accounted for tick life  
252 stages pre- and post-burn along with fire intensity); unfortunately, they were not ideal.  
253 The burns were conducted in vastly different environments – the high intensity fire  
254 took place in California chaparral while the low intensity fire took place in Illinois oak  
255 woodland. The high intensity burn was only conducted once in the summer, while  
256 the low intensity burn was conducted in the spring for two consecutive years. We  
257 were unable to find any sources of data from similar geographic locations or number  
258 of burns that were detailed enough in terms of tick data and fire intensity data to  
259 be used. These variances between the two data sets have the potential to drastically  
260 affect the burn results.

### 261 **3 Results**

262 To address our research goals, we started by looking at how different burn frequencies  
263 and intensities affected tick populations, focusing specifically on the nymphs; since the  
264 primary mode of transmission for Lyme disease from ticks to humans is through infec-  
265 tious nymphs. High intensity fires substantially change the above ground structure,  
266 with no live branches and few shrub skeletons left over [6, 23]. These burns are much  
267 more uniform than those at lower intensities, which are patchy and have vegetation  
268 cover and woody debris left over that ticks are able to survive the burn in [8]. Our  
269 first simulation in Figure 3 shows the substantial difference between high intensity and  
270 low intensity burns regarding how effective they are at reducing the infectious nymph  
271 population. Although both burns start out at around the same effectiveness regardless  
272 of intensity, the high intensity burn proves to reduce the infectious nymph population  
273 much more efficiently than the low intensity burn. The infectious nymph population  
274 affected by the low intensity fire continues to increase despite the burns, while the  
275 infectious nymph population affected by the high intensity fire remains consistently  
276 low.

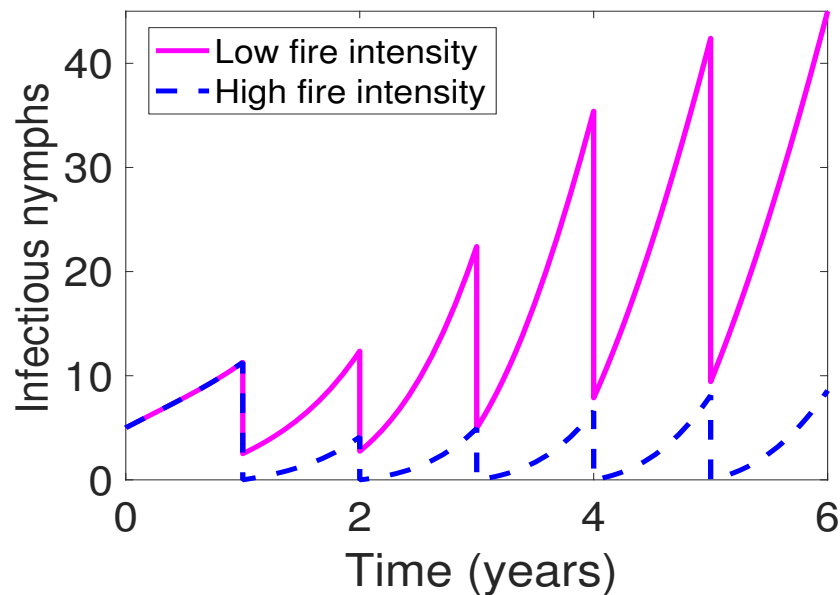

Figure 3: Simulation of annual burns for six years at varying intensities. Parameter values are given in Table 1.

277 In our second simulation shown in Figure 4, we consider the duration between burns  
278 for both high and low intensity fires. We consider the effects of burning for a period  
279 of six years once every six years, once every three years, once every other year, and  
280 annually. We found in general that as the duration between burns decreases the infec-  
281 tious nymph population also decreases regardless of the burn intensities. Furthermore,  
282 we found that the duration between burns has a more significant effect on ticks with  
283 higher intensity fires than with lower intensity fires. Fire intensity appears to have a  
284 larger influence on tick reduction than duration of the burns, as burning fewer times  
285 at a higher intensity is more effective than burning more times at a lower intensity.  
286 For example, high intensity burns once every three years reduces the infectious nymph  
287 population more than low intensity burns once every two years. However, high in-  
288 tensity burns might be unrealistic due to environmental factors. In that case, annual  
289 burns at low intensity result in the most significant reduction of infectious nymphs in  
290 its category.

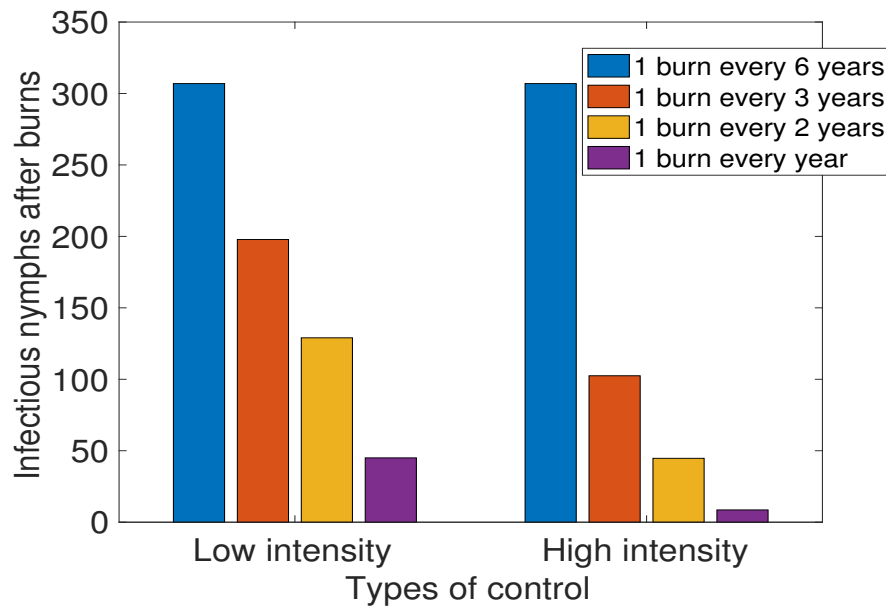

Figure 4: Simulation of varying intervals between burns, separated by their intensity

## 4 Discussions and conclusions

### 4.1 Discussions

The most effective simulation in minimizing infectious nymph populations is having annual high intensity burns, although this is not always practical due to environmental factors such as weather, burn location, and fuel loads. The geographic location of the burn is also important to consider, as it is riskier to have higher intensity fires closer to human settlements. Most prescribed fires are at low to moderate intensity and are repeated every 1-5 years, with their primary objective being to reduce fuel loads and act as a wildfire prevention tool [18]. There have been a few negative outcomes associated with intense annual burning such as oak tree mortality, soil compaction, and an increased number of tree cankers and tree colonization by root fungus [12], but these depend heavily on the type of environment that is being burned. Overall, infectious tick populations substantially decrease as the time between burn also decreases, regardless of the intensity that the burn is conducted at.

These findings were confirmed in a private conversation with Gallagher of the U.S. Forest Service Research and Development team. He recently finished working on a study that looked at how long-term prescribed burns affected tick populations in New Jersey oak woodlands. They found preliminary data that strongly suggests that different tick species are impacted differently by prescribed burns due to their varying moisture sensitivities [6]. It appears that black-legged ticks, the primary vector of Lyme disease in humans, are the most sensitive to moisture loss while Lone Star ticks and Gulf coast ticks seem to be more resilient. Gallagher believes that one of the reasons for this is the thickness of the scutum, which is a shield-like plate on the back of hardback ticks [6]. In general, initial data from this study agrees with the results of our model. Their high intensity burns, occurring once every 20 years with

316 data collection for four consecutive years after the burn, saw the greatest reduction in  
317 tick populations. Annual low intensity burns for over 25 years had the second largest  
318 tick reduction, while the single low intensity burn showed the smallest amount of tick  
319 reduction.

320 Few research studies have examined the effects of prescribed fire on tick populations  
321 and disease prevalence [1] . The studies that do often choose to focus on one aspect,  
322 usually that of how the burns affect the ticks, with the fire itself being of secondary  
323 interest [9]. Future research that records detailed information about fires, such as  
324 flame height, difference in vegetation presence before and after the burn, how the fire  
325 was ignited, weather conditions during the burns, overall fire behavior, etc. would  
326 be extremely helpful in ensuring the accuracy of the parameters used in the model.  
327 Knowledge about the exact dates of the burns and the specifics of the duration be-  
328 tween burns is also useful, as seasonality has the potential to play a large role in the  
329 effectiveness of burns on disease prevalence. This is especially true with diseases that  
330 are primarily found to be transmitted to humans in a certain life stage of the tick,  
331 such as with nymphs and Lyme disease. Knowing the exact dates of the burns along  
332 with the time in between is useful when comparing the burn results to tick life cycles.  
333 For example, spring burns will mostly kill nymphs, although this can vary by species.  
334 Noting the geographic context is also important, as environment plays a role in how  
335 these burn impact tick populations. Finally, increasing the time frame of studies that  
336 look at how prescribed fire impacts ticks will also be useful. Many studies that claim  
337 to study how ticks are affected by prescribed fires only involve a single burn, which is  
338 vastly different from true prescribed burning, which involves regular fires over many  
339 years.

340 Land geography seems to have a role in the effectiveness of prescribed burns on tick  
341 population reduction regarding how fast the environment is able to regrow back to its  
342 original state before the burn, although to the best of our knowledge there have not  
343 been any studies that specifically look at this. Certain environmental factors might  
344 make certain geographic locations better candidates for prescribed fires when the main  
345 goal is to reduce tick populations, and this is a subject that is worth looking into in  
346 the future. It also appears that different tick species have different levels of heat and  
347 moisture resistance, causing them to be affected differently by the fires [6, 8]. Only  
348 very preliminary research has been done on this so far, although it is a topic that  
349 will substantially influence the choice of whether or not to use prescribed fires for tick  
350 reduction.

## 351 **4.2 Conclusion**

352 To conclude, in this study we develop a simple model for Lyme disease transmission  
353 and used it to investigate the impact of prescribed burn frequency and fire intensity  
354 on the spread of Lyme disease. To the best of our knowledge, this is the first model  
355 to incorporate the effect of fire into a mathematical model of ticks and Lyme disease,  
356 . The key findings from this study are summarized below.

357 The simulations of the Lyme disease model (5) with prescribed burns show that:

- 358 (i) The most influential parameters impacting the reproduction number,  $\mathcal{R}_0$ , from  
359 the sensitivity analysis are  $\pi_M, \sigma_T, K, \mu_T, \beta_T, \beta_M$ .
- 360 (i) Intensity appears to be a larger influence on tick reduction than duration is – it  
361 is better to burn fewer times at a high intensity than to burn more often at a  
362 lower intensity.
- 363 (ii) Burning at high intensity is preferable to burning at low intensity whenever  
364 possible, although high intensity may be unrealistic due to environmental factors.
- 365 (iii) For low intensity, annual burns resulted in the most significant reduction of in-  
366 fectious nymphs, which are the primary carriers of Lyme disease.

367 This study has shown the effect of prescribed fire on ticks and the spread of Lyme  
368 disease. In a future study we will consider the impact of seasonality on the effec-  
369 tiveness of prescribed burns and the impact of the timing of the burns on disease  
370 spread. Geographic landscape and tick habitat are important factors affecting the  
371 tick population. In another future work, we will consider different types of geographic  
372 landscapes and determine which landscape is most effective in using prescribed burns  
373 for tick population control and reduction.

## 374 Data Availability

375 All data used in this study came from published, cited sources, and are included in  
376 the text.

## 377 Conflicts of Interest

378 The authors declare that there are no conflicts of interest.

## 379 Acknowledgement

380 This research was supported by National Science Foundation EPSCOR Track 2 under  
381 the grant number 1920946.

## 382 References

- 383 [1] Brian F Allan. Influence of prescribed burns on the abundance of *amblyomma*  
384 *americanum* (acari: ixodidae) in the Missouri Ozarks. *Journal of medical ento-*  
385 *mology*, 46(5):1030–1036, 2009.
- 386 [2] Liz. Bowie. Lyme disease research in Howard County seeks best way to reduce  
387 tick populations.  
388 [https://www.washingtonpost.com/local/lyme-disease-research-in-howard-coun-](https://www.washingtonpost.com/local/lyme-disease-research-in-howard-county/2018/10/04/3bb2a8a4-c74f-11e8-9b1c-a90f1daae309_story.html)  
389 [2018/10/04/3bb2a8a4-c74f-11e8-9b1c-a90f1daae309\\_story.html](https://www.washingtonpost.com/local/lyme-disease-research-in-howard-county/2018/10/04/3bb2a8a4-c74f-11e8-9b1c-a90f1daae309_story.html),  
390 2018. Assessed August 02, 2020.

- 391 [3] Center for Disease Control and Prevention. Tickborne disease surveillance data  
392 summary.  
393 <https://www.cdc.gov/ticks/data-summary/index.html>, 2019. August  
394 02, 2020.
- 395 [4] O. Diekmann, J.A.P. Heesterbeek, and J.A.J. Metz. On the definition and the  
396 computation of the basic reproduction ratio  $r_0$  in models for infectious diseases  
397 in heterogeneous populations. *Journal of mathematical biology*, 28(4):365–382,  
398 1990.
- 399 [5] MA Diuk-Wasser, AG Gatewood, M Roberto Cortinas, S Yaremych-Hamer,  
400 J Tsao, Uriel Kitron, G Hickling, JS Brownstein, E Walker, J Piesman, et al.  
401 Spatiotemporal patterns of host-seeking ixodes scapularis nymphs (acari: Ixodi-  
402 dae) in the United States. *Journal of medical entomology*, 43(2):166–176, 2014.
- 403 [6] Gallagher and Kreye. Preliminary study. *Private conversation*, 2020.
- 404 [7] S. Gao, J.J. Chen, L. and Nieto, and A. Torres. Analysis of a delayed epidemic  
405 model with pulse vaccination and saturation incidence. *Vaccine*, 24(35-36):6037–  
406 6045, 2006.
- 407 [8] M.E. Gilliam, W.T. Rechkemmer, K.W. McCravy, and S.E. Jenkins. The influ-  
408 ence of prescribed fire, habitat, and weather on *amblyomma americanum* (ixodida:  
409 ixodidae) in west-central Illinois, USA. *Insects*, 9(2):36, 2018.
- 410 [9] E.R. Gleim, L.M. Conner, R.D. Berghaus, M.L. Levin, G.E. Zemtsova, and M.J.  
411 Yabsley. The phenology of ticks and the effects of long-term prescribed burning  
412 on tick population dynamics in southwestern Georgia and northwestern Florida.  
413 *PLoS One*, 9(11):e112174, 2014.
- 414 [10] E.R. Gleim, G.E. Zemtsova, R.D. Berghaus, M.L. Levin, M. Conner, and M.J.  
415 Yabsley. Frequent prescribed fires can reduce risk of tick-borne diseases. *Scientific*  
416 *reports*, 9(1):1–10, 2019.
- 417 [11] JS Gray, H Dautel, A Estrada-Peña, O Kahl, and E Lindgren. Effects of climate  
418 change on ticks and tick-borne diseases in Europe. *Interdisciplinary perspectives*  
419 *on infectious diseases*, 2009, 2009.
- 420 [12] KA Jacobs, B Nix, and BC Scharenbroch. The effects of prescribed burning on  
421 soil and litter invertebrate diversity and abundance in an Illinois Oak Woodland.  
422 *Natural Areas Journal*, 35(2):318–327, 2015.
- 423 [13] T. Levi, A.M. Kilpatrick, M. Mangel, and C.C. Wilmers. Deer, predators, and  
424 the emergence of Lyme disease. *Proceedings of the National Academy of Sciences*,  
425 109(27):10942–10947, 2012.
- 426 [14] R. Llera and E. Ward. Ticks in dogs.  
427 <https://ucahospitals.com/know-your-pet/ticks-in-dogs>, Assessed  
428 August 02, 2020.
- 429 [15] Y. Lou, L. Liu, and D. Gao. Modeling co-infection of *ixodes* tick-borne pathogens.  
430 *Mathematical Biosciences & Engineering*, 14(5&6):1301, 2017.
- 431 [16] T.N. Mather, D.C. Duffy, and S.R. Campbell. An unexpected result from burning  
432 vegetation to reduce lyme disease transmission risks. *Journal of medical ento-*  
433 *mology*, 30(3):642–645, 1993.



- 434 [17] Van den Driessche P. and Watmough J. Reproduction numbers and sub-threshold  
435 endemic equilibria for compartmental models of disease transmission. *Mathemat-*  
436 *ical biosciences*, 180(1-2):29–48, 2002.
- 437 [18] KA Padgett, LE Casher, SL Stephens, and RS Lane. Effect of prescribed fire for  
438 tick control in California chaparral. *Journal of Medical Entomology*, 46(5):1138–  
439 1145, 2009.
- 440 [19] V.J. Polito. *Effects of patch mosaic burning on tick burden on cattle, tick survival,*  
441 *and tick abundance*. PhD thesis, Oklahoma State University, 2012.
- 442 [20] Shane M Tripp. Prescribed fire and deer ticks: A management method for the  
443 primary vector of lyme disease in the eastern United States.  
444 [https://orb.binghamton.edu/cgi/viewcontent.cgi?article=1011&](https://orb.binghamton.edu/cgi/viewcontent.cgi?article=1011&context=dissertation_and_theses)  
445 [context=dissertation\\_and\\_theses](https://orb.binghamton.edu/cgi/viewcontent.cgi?article=1011&context=dissertation_and_theses), 2017.
- 446 [21] United States Environmental Protection Agency. Lyme disease.  
447 [https://www.epa.gov/sites/production/files/2017-02/documents/](https://www.epa.gov/sites/production/files/2017-02/documents/print_lyme_2016.pdf)  
448 [print\\_lyme\\_2016.pdf](https://www.epa.gov/sites/production/files/2017-02/documents/print_lyme_2016.pdf), 2016. Assessed August 02, 2020.
- 449 [22] P. Van den Driessche and J. Watmough. Reproduction numbers and sub-  
450 threshold endemic equilibria for compartmental models of disease transmission.  
451 *Mathematical biosciences*, 180(1):29–48, 2002.
- 452 [23] Robert J Whelan. *The ecology of fire*. Cambridge university press, 1995.
- 453 [24] X. Xu, Y. Xiao, and R.A. Cheke. Models of impulsive culling of mosquitoes to in-  
454 terrupt transmission of West Nile virus to birds. *Applied Mathematical Modelling*,  
455 39(13):3549–3568, 2015.

## 456 A Analysis of the tick model (5)

### 457 Basic qualitative properties

#### 458 Positivity and boundedness of solutions

459 For the tick model (5) to be epidemiologically meaningful, it is essential to prove that  
460 all its state variables are non-negative for all time. In other words, solutions of the  
461 model system (5) with non-negative initial data will remain non-negative for all time  
462  $t > 0$ .

463 **Lemma 1.** *Let the initial data  $F(0) \geq 0$ , where  $F(t) = (S_M(t), I_M(t), S_E(t), S_L(t), I_L(t), S_N(t), I_N,$   
464  $I_A(t))$ . Then the solutions  $F(t)$  of the tick model (5) are non-negative for all  $t > 0$ .*

465 *Proof.* Let  $t_1 = \sup\{t > 0 : F(t) > 0 \in [0, t]\}$ . Thus,  $t_1 > 0$ . It follows from the first  
466 equation of the system (5), that

$$\frac{dS_M(t)}{dt} = \pi_M - \lambda_M(t)S_M(t) - \mu_M S_M(t) \quad (\text{A-1})$$

467 where  $\lambda_M(t) = \frac{\beta_M(I_L(t) + I_N(t) + I_A(t))}{N_M(t)}$ .

468 Using the integrating factor method we can rewrite equation (A-1) as

$$\frac{d}{dt} \left[ S_M(t) \exp \left( \int_0^{t_1} \lambda_M(\xi) d\xi + \mu_M t \right) \right] = \pi_M \exp \left( \int_0^{t_1} \lambda_M(\xi) d\xi + \mu_M t \right).$$

469 Hence,

$$S_M(t_1) \exp \left( \int_0^{t_1} \lambda_M(\xi) d\xi + \mu_M t_1 \right) - S_M(0) = \int_0^{t_1} \pi_M \exp \left( \int_0^p \lambda_M(\xi) d\xi + \mu_M p \right)$$

470 so that,

$$\begin{aligned} S_M(t_1) &= S_M(0) \exp \left[ - \left( \int_0^{t_1} \lambda_M(\xi) d\xi + \mu_M t_1 \right) \right] \\ &+ \exp \left[ - \left( \int_0^{t_1} \lambda_M(\xi) d\xi + \mu_M t_1 \right) \right] \int_0^{t_1} \pi_M \exp \left( \int_0^p \lambda_M(\xi) d\xi + \mu_M p \right) \\ &> 0. \end{aligned}$$

471 Similarly, it can be shown that  $F > 0$  for all  $t > 0$ . □

## 472 Invariant regions

473 The Lyme disease model (5) will be analyzed in a biologically-feasible region as follows.  
474 Consider the feasible region

$$\Omega = \Omega_M \times \Omega_T \subset \mathbb{R}_+^2 \times \mathbb{R}_+^7$$

where,

$$\Omega_M = \left\{ (S_M(t), I_M(t)) \in \mathbb{R}_+^2 : N_M(t) \leq \frac{\pi_M}{\mu_M} \right\},$$

and

$$\Omega_T = \left\{ (S_E(t), S_L(t), I_L(t), S_N(t), I_N(t), S_A(t), I_A(t)) \in \mathbb{R}_+^7 : S_E(t) \leq K, N_T(t) \leq \frac{\sigma_T K}{\mu_T} \right\},$$

475 where  $N_T = S_L + I_L + S_N + I_N + S_A + I_A$ .

476 **Lemma 2.** *The region  $\Omega \subset \mathbb{R}_+^9$  is positively-invariant for the model (5) with non-*  
477 *negative initial conditions in  $\mathbb{R}_+^9$ .*

*Proof.* Summing the first two equations of model (5), we have

$$\frac{dN_M(t)}{dt} = \pi_M - \mu_M N_M$$

478 Thus,

$$N_M(t) = \frac{\pi_M}{\mu_M} + \left( N_M(0) - \frac{\pi_M}{\mu_M} \right) e^{-\mu_M t}. \quad (\text{A-2})$$

479 In particular, if  $N_M(0) = \frac{\pi_M}{\mu_M}$ , then  $N_M(t) = \frac{\pi_M}{\mu_M}$ .

480 Next, the last seven equations of model (5) give the following after summing the  
481 equations representing the larvae, nymphs, and adult stages

$$\frac{dS_E(t)}{dt} = \pi_T \left(1 - \frac{S_E}{K}\right) (S_A + I_A) - (\sigma_T + \mu_E) S_E \quad (\text{A-3})$$

$$\frac{dN_T(t)}{dt} = \sigma_T S_E - \mu_T N_T, \quad (\text{A-4})$$

where  $\mu_T = \min\{\mu_L, \mu_N, \mu_A\}$ . Since  $K$  is the carrying capacity, it follows that  $S_E \leq K$ . Hence, equation (A-4) becomes

$$\frac{dN_T(t)}{dt} \leq \sigma_T K - \mu_T N_T.$$

482 Thus,

$$N_T(t) \leq \frac{\sigma_T K}{\mu_T} + \left(N_T(0) - \frac{\sigma_T K}{\mu_T}\right) e^{-\mu_T t}. \quad (\text{A-5})$$

483 Equations (A-2) and (A-5) implies that  $N_M T(t)$  and  $N_T(t)$  are bounded and all so-  
484 lutions starting in the region  $\Omega$  remain in  $\Omega$ . Thus, the region is positively-invariant  
485 and hence, the region  $\Omega$  attracts all solutions in  $\mathbb{R}_+^9$ .  $\square$

## 486 B Stability of disease-free equilibrium (DFE) and 487 the reproduction number $\mathcal{R}_0$ of the Lyme disease 488 model (5)

489 In this section, the conditions for the stability of the equilibria of the model (5) are  
490 stated. The Lyme disease model (5) has a disease free equilibrium (DFE). The DFE  
491 is obtained by setting the right-hand sides of the equations in the model (5) to zero,  
492 which is given by

$$\mathcal{E}_0 = \left( S_M^*, I_M^*, S_E^*, S_L^*, I_L^*, S_N^*, I_N^*, S_A^*, I_A^* \right)$$

493 where

$$\begin{aligned} S_M^* &= \frac{\pi_M}{\mu_M} \\ S_E^* &= \frac{K[\pi_T \gamma_T \sigma_T \tau_T - \mu_A(\gamma_T + \mu_N)(\tau_T + \mu_L)(\sigma_T + \mu_E)]}{\pi_T \tau_T \gamma_T \sigma_T} \\ S_L^* &= \frac{K[\pi_T \gamma_T \sigma_T \tau_T - \mu_A(\gamma_T + \mu_N)(\tau_T + \mu_L)(\sigma_T + \mu_E)]}{\pi_T \tau_T \gamma_T (\tau_T + \mu_L)} \\ S_N^* &= \frac{K[\pi_T \gamma_T \sigma_T \tau_T - \mu_A(\gamma_T + \mu_N)(\tau_T + \mu_L)(\sigma_T + \mu_E)]}{\pi_T \gamma_T (\tau_T \gamma_T + \tau_T \mu_N + \mu_L \gamma_T + \mu_L \mu_N)} \\ S_A^* &= \frac{K[\pi_T \gamma_T \sigma_T \tau_T - \mu_A(\gamma_T + \mu_N)(\tau_T + \mu_L)(\sigma_T + \mu_E)]}{\pi_T \mu_A (\tau_T \gamma_T + \tau_T \mu_N + \mu_L \gamma_T + \mu_L \mu_N)}. \end{aligned}$$

494 The stability of  $\mathcal{E}_0$  can be established by calculating the reproduction number  $\mathcal{R}_0$   
 495 using the next generation operator method on system (5). Taking  $I_L$ ,  $I_N$ ,  $I_A$ , and  $I_M$   
 496 as the infected compartments and then using the notation in [22], the Jacobian  $F$  and  
 497  $V$  matrices for new infectious terms and the remaining transfer terms, respectively,  
 498 are defined as:

$$F = \begin{pmatrix} 0 & 0 & 0 & \frac{S_L^* \beta_T}{S_M^*} \\ 0 & 0 & 0 & \frac{S_N^* \beta_T}{S_M^*} \\ 0 & 0 & 0 & \frac{S_A^* \beta_T}{S_M^*} \\ \beta_M & \beta_M & \beta_M & 0 \end{pmatrix}, \quad V = \begin{pmatrix} k_1 & 0 & 0 & 0 \\ -\tau_T & k_2 & 0 & 0 \\ 0 & -\gamma_T & \mu_A & 0 \\ 0 & 0 & 0 & \mu_M \end{pmatrix}.$$

499 where  $k_1 = \tau_T + \mu_L$ ,  $k_2 = \gamma_T + \mu_N$

500

$$\begin{aligned} \mathcal{R}_0 &= \rho(FV^{-1}) \\ &= \sqrt{\frac{\beta_M \beta_T [k_1 k_2 S_A^* + (k_2 \mu_A + \tau_T \mu_A + \tau_T \gamma_T) S_L^* + (\mu_A + \gamma_T) k_1 S_N^*]}{k_1 k_2 \mu_A S_M^* \mu_M}}. \end{aligned} \quad (\text{B-1})$$

501 where,  $\rho$  is the spectral radius.

We made a simplifying assumption that  $\mu_L = \mu_N = \mu_A = \mu_T$ . Then, the reproduction number in (B-1) becomes

$$\mathcal{R}_0 = \sqrt{\frac{\beta_M \beta_T (S_A^* + S_L^* + S_N^*)}{S_M^* \mu_M \mu_T}},$$

502 The expression  $\mathcal{R}_0$  is the number of secondary infections in completely susceptible  
 503 population due to infections from one introduced tick or mouse with Lyme disease.  
 504 Further, using Theorem 2 in [22], the following result is established.

505 **Lemma 3.** *The disease-free equilibrium (DFE) of the Lyme disease model (5) is*  
 506 *locally asymptotically stable (LAS) if  $\mathcal{R}_0 < 1$  and unstable if  $\mathcal{R}_0 > 1$ .*

## 507 C Existence and Stability of Disease Free Periodic 508 Solution

509 To determine the existence of the disease-free periodic solution, we first sum up the last  
 510 seven equations of model (8), and let  $\mu_L = \mu_N = \mu_A = \mu_T$ , and  $\nu_L = \nu_N = \nu_A = \nu_T$ .  
 511 Now, using the fact that  $K$  is the carrying capacity, it follows that  $S_E \leq K$ , hence,  
 512 for  $t \geq 0$  system (8) simplifies to

$$\left. \begin{aligned} \frac{dS_M}{dt} &= \pi_M - \frac{\beta_M I_T S_M}{S_M + I_M} - \mu_M S_M \\ \frac{dI_M}{dt} &= \frac{\beta_M I_T S_M}{S_M + I_M} - \mu_M I_M \\ \frac{dS_T(t)}{dt} &\leq \sigma_T K - \frac{\beta_T I_M S_T}{S_M + I_M} - \mu_T S_T \\ \frac{dI_T}{dt} &= \frac{\beta_T I_M S_T}{S_M + I_M} - \mu_T I_T \end{aligned} \right\} t \neq nT, n \in \mathbb{N} \quad (\text{C-1})$$

$$\left. \begin{aligned} S_M^+ &= (1 - \nu_M) S_M^-, \\ I_T^+ &= (1 - \nu_M) I_M^-, \\ S_T^+ &= (1 - \nu_T) S_T^-, \\ I_T^+ &= (1 - \nu_T) I_T^- \end{aligned} \right\} t = nT, n \in \mathbb{N}, \quad (\text{C-2})$$

513 where  $S_T = S_L + S_N + S_A$  and  $I_T = I_L + I_N + I_A$ .

514 At disease free equilibrium,  $I_M(t) = I_T(t) = 0$ , then (C-1) and (C-2) becomes

$$\left. \begin{aligned} \frac{dS_M}{dt} &= \pi_M - \mu_M S_M \\ \frac{dS_T(t)}{dt} &\leq \sigma_T K - \mu_T S_T \end{aligned} \right\} t \neq nT, n \in \mathbb{N} \quad (\text{C-3})$$

$$\left. \begin{aligned} S_M^+ &= (1 - \nu_M) S_M^-, \\ S_T^+ &= (1 - \nu_T) S_T^- \end{aligned} \right\} t = nT, n \in \mathbb{N}, \quad (\text{C-4})$$

515 In the time interval  $nT \leq t \leq (n+1)T$ , the first equation of system (C-3) has the  
516 solution

$$S_M(t) = \frac{\pi_M}{\mu_M} + e^{-(\mu_M)(t-nT)} \left[ S_M(nT^+) - \frac{\pi_M}{\mu_M} \right]. \quad (\text{C-5})$$

517 Let  $S_M^{n+1}$  be the size of susceptible population after the  $(n+1)$ -th pulse, i.e.  $S_M^{n+1} =$   
518  $S_M((n+1)T^+)$ . From (C-4) we have

$$S_M^{n+1} = (1 - \nu_M) \left[ \frac{\pi_M}{\mu_M} + e^{-(\mu_M)T} \left( S_M^n - \frac{\pi_M}{\mu_M} \right) \right] := \psi(S_M^n).$$

The map  $\psi$  has a unique positive fixed point

$$S_M^* = \frac{\pi_M(1 - \nu_M)(1 - e^{-\mu_M T})}{\mu_M[1 - (1 - \nu_M)e^{-\mu_M T}]};$$

519 If  $t \neq nT$

$$\begin{aligned}\bar{S}_M(t) &= \frac{\pi_M}{\mu_M} + \frac{\pi_M}{\mu_M} e^{-\mu_M(t+T-(n+1)T)} \left[ \frac{(1-\nu_M)(1-e^{-\mu_M T})}{[1-(1-\nu_M)e^{-(\pi+\omega)T}]} - 1 \right] \quad (\text{C-6}) \\ &= \frac{\pi_M}{\mu_M} + \frac{\pi_M}{\mu_M} e^{-\mu_M(t-nT)} \left[ \frac{(1-\nu_M)(1-e^{-\mu_M T})}{[1-(1-\nu_M)e^{-\mu_M T}]} - 1 \right] \\ &= \bar{S}_M(t+1),\end{aligned}$$

520 and in case  $t = nT$ ,  $\bar{S}_M(t) = S_M^* = \bar{S}_M((n+1)T)$ , so (C-6) is periodic with period  
521  $T$ . Thus, the solution of the first equation of (C-3) is a solution not only in the time  
522 interval  $[0, T)$ , but also for all  $t \geq 0$ . Hence, the solution of (C-6) in the time interval  
523  $[0, T)$  is

$$\bar{S}_M(t) = \frac{\pi_M}{\mu_M} + \frac{\pi_M}{\mu_M} e^{-\mu_M(t-nT)} \left[ \frac{(1-\nu_M)(1-e^{-\mu_M T})}{[1-(1-\nu) e^{-\mu_M T}]} - 1 \right].$$

Following the above argument, the solution of the second equation of (C-3) for all  
 $t \geq 0$  is given as

$$\bar{S}_T(t) = \frac{K\sigma_T}{\mu_T} + \frac{K\sigma_T}{\mu_T} e^{-\mu_T(t-nT)} \left[ \frac{(1-\nu_T)(1-e^{-\mu_T T})}{[1-(1-\nu_T)e^{-\mu_T T}]} - 1 \right]$$

524 Further, similar to Gao et al. (2006, Lemma 2.2) [7], it can be shown that  $(\bar{S}_M(t), \bar{S}_T(t))$   
525 is globally asymptotically stable by using stroboscopic map. Hence, we summarize the  
526 results below as

527 **Lemma 4.** *The model (C-3)(C-4) has a unique disease-free periodic solution given as*

$$\begin{aligned}\bar{S}_M(t) &= \frac{\pi_M}{\mu_M} + \frac{\pi_M}{\mu_M} e^{-\mu_M(t-nT)} \left[ \frac{(1-\nu_M)(1-e^{-\mu_M T})}{[1-(1-\nu) e^{-\mu_M T}]} - 1 \right] \\ \bar{S}_T(t) &= \frac{K\sigma_T}{\mu_T} + \frac{K\sigma_T}{\mu_T} e^{-\mu_T(t-nT)} \left[ \frac{(1-\nu_T)(1-e^{-\mu_T T})}{[1-(1-\nu_T)e^{-\mu_T T}]} - 1 \right] \\ \bar{I}_M(t) &= 0, \quad \bar{I}_T(t) = 0.\end{aligned}$$

528 From Lemma 4, system (C-3)-(C-4), admits the disease-free periodic solution (DFPS)  
529  $(\bar{S}_M(t), 0, \bar{S}_T(t), 0)$  on every impulsive interval  $[nT, (n+1)T]$ . To determine the stability  
530 of DFPS of system (C-3)-(C-4), we follow the approach in [24]. and define the  
531 following matrices

$$F = \begin{pmatrix} 0 & \beta_M \\ \beta_T \bar{S}_T / \bar{S}_M & 0 \end{pmatrix}, \quad V = \begin{pmatrix} -\mu_M & 0 \\ 0 & -\mu_T \end{pmatrix}$$

532 Let  $A$  be a  $n \times n$  matrix,  $\Phi_{A(\cdot)}(t)$  be the fundamental solution matrix of the linear or-  
533 dinary differential system  $x' = Ax$ , and  $\rho(\Phi_{A(\cdot)}(w))$  be the spectral radius of  $\Phi_{A(\cdot)}(w)$ .  
534 Let  $S_M = s_m(t) + \bar{S}_M(t)$ ,  $S_T = s_t(t) + \bar{S}_T(t)$ ,  $I_M = i_m(t)$ ,  $I_T = i_t(t)$ . Then, system  
535 (C-3) can be written as

$$\begin{cases} x'(t) = Qx(t), & t \neq nT, n \in \mathbb{N} \\ x(t) = Px(t), & t = nT, n \in \mathbb{N} \end{cases} \quad (\text{C-7})$$

where

$$x(t) = (S_M(t), S_T(t), I_M(t), I_T(t))^T, \quad Q = \begin{pmatrix} U & B \\ 0 & F - V \end{pmatrix}, \quad P = \begin{pmatrix} P_1 & 0 \\ 0 & P_2 \end{pmatrix}$$

with

$$U = \begin{pmatrix} -\pi & \omega & \kappa \\ -\mu_M & 0 & \\ 0 & -\mu_T & \end{pmatrix}, \quad B = \begin{pmatrix} 0 & -\beta_M \\ -\beta_T \bar{S}_T / \bar{S}_M & 0 \end{pmatrix}$$

$$P_1 = \begin{pmatrix} 1 - \nu_M & 0 \\ 0 & 1 - \nu_T \end{pmatrix}, \quad P_2 = \begin{pmatrix} 1 - \nu_M & 0 \\ 0 & 1 - \nu_T \end{pmatrix}.$$

536 Let  $\Phi_Q(t) = (Q_{ij})_{1 \leq i, j \leq 2}$  be the fundamental matrix of  $x'(t) = Qx(t)$ . Then  $\Phi'_Q(t) = Q\Phi_Q(t)$   
537 with the initial value  $\Phi_Q(0) = I$ , the identity matrix. Solving the equation gives

$$\Phi_Q(t) = \begin{pmatrix} e^{Ut} & \Phi_{12}(t) \\ 0 & \Phi_{(F-V)}(t) \end{pmatrix},$$

then we have

$$P\Phi_Q(T) = \begin{pmatrix} P_1 e^{UT} & P_1 \Phi_{12}(T) \\ 0 & P_2 \Phi_{(F-V)}(T) \end{pmatrix}.$$

538 Therefore, the stability DFPS is dependent on eigenvalues of the matrices  $P_1 e^{UT}$  and  
539  $P_2 \Phi_{(F-V)}(T)$ . The eigenvalues of  $P_1 e^{UT}$  are  $(1 - \nu_M) e^{-\int_0^T \mu_M dt}$ , and  $(1 - \nu_T) e^{-\int_0^T \mu_T dt}$ ,  
540 and we can see that the eigenvalues of  $P_1 e^{UT}$  are less than one. Furthermore, if spectral  
541 radius  $\rho(P_2 \Phi_{(F-V)}(T)) < 1$ , then DFPS is stable. This, leads to the following theorem.

542 **Theorem 1.** *If  $\rho(P_2 \Phi_{(F-V)}(T)) < 1$  holds true, then the disease-free periodic solution*  
543  *$(\bar{S}_M(t), \bar{S}_T(t), 0, 0)$  of system (C-1)-(C-2) is locally asymptotically stable.*

$$\begin{aligned} \rho(P_2 \Phi_{(F-V)}(T)) &= (1 - \nu_M) \frac{1}{2} e^{-\int_0^T \mu_M d\tau} + (1 - \nu_T) \frac{1}{2} e^{-\int_0^T \mu_T d\tau} \\ &\quad + \frac{1}{2} \left\{ \left[ (1 - \nu_M) e^{-\int_0^T \mu_M d\tau} - (1 - \nu_T) e^{-\int_0^T \mu_T d\tau} \right]^2 \right. \\ &\quad \left. + 4(1 - \nu_M)(1 - \nu_T) e^{-\int_0^T \beta_M d\tau} e^{\int_0^T \beta_T \bar{S}_T / \bar{S}_M d\tau} \right\}^{\frac{1}{2}} \end{aligned}$$

544 We denote the spectral radius as  $\mathcal{R}_p = \rho(P_2 \Phi_{(F-V)}(T))$ . Note,  $\mathcal{R}_p$  does not produce  
545 the number of individuals infected by a single infected carrier or infectious individual.  
546 Namely, it does not produce the average number of secondary infections [24]. However,  
547 it works as a threshold such that the disease persists as  $\mathcal{R}_p > 1$  [24].
